# Supplementary material for: Engineering a colorimetric yeast-based assay to detect small molecules in the gastrointestinal system
Source: Frontiers journal article supplement (doi:10.3389/fsybi.2024.1265343), 2024-06-27
Supplement: Table_1.XLSX [file Table_1.XLSX]

## Sheet: Yeast strains
Strain#	Name	Description	Selection marker	Genotype	Notes
YLD004	Saccharomyces cerevisiae var. boulardii lyo CNCM I-745 (Florastor®)	Probiotic yeast strain	none	wildtype
YLD081	ade2d::loxP-ADE2-loxP	ADE2 flanked with loxP sites (divergent) reporter inserted at original ADE2 locus in YLD079 background (ade2d::GFP, S.boulardii).	none	wildtype	LD322
YLD109	ade2d::lox44-ADE2-lox43 ,Int21-4::pTRX2_Yap1_tADH1,Int20-2::pTRX2_Yap1_tADH1 (S.boulardii)	ADE2 flanked with variant lox sites (lox44 and lox43) reporter inserted at original ADE2 locus in YLD063 (ade2d::GFP, 2xYAP1).	none	wildtype	LD381
YLD132	int18-1:: pTDH3_rtTA-M2-SE-G72P; ade2d::loxP-ADE2-loxP	Expresses optimized unleaky reverse tetracycline transactivator (rtTA-M2-SE-G72P) under control of yeast TDH3 promoter at integration site 18-1. YLD081 background	none	wildtype	LD478
YLD133	int18-1:: pMYO2_rtTA-M2-SE-G72P; ade2d::loxP-ADE2-loxP	Expresses optimized unleaky reverse tetracycline transactivator (rtTA-M2-SE-G72P) under control of yeast Myo2 promoter at integration site 18-1. YLD081 background	none	wildtype	LD478
YLD134	int19-1::pTET4_GFP; int18-1:: pTDH3_rtTA-M2-SE-G72P; ade2d::loxP-ADE2-loxP	Expresses GFP under doxycycline inducible promoter (pTET4). YLD132 background	none	wildtype	LD478
YLD135	int19-1::pTET4_GFP; int18-1:: pMYO2_rtTA-M2-SE-G72P; ade2d::loxP-ADE2-loxP	Expresses GFP under doxycycline inducible promoter (pTET4). YLD133 background	none	wildtype	LD478
YLD136	int19-1::pTET4_Cre; int18-1:: pTDH3_rtTA-M2-SE-G72P; ade2d::loxP-ADE2-loxP	Expresses Cre under doxycycline inducible promoter (pTET4). YLD132 background	none	wildtype	LD478
YLD137	int19-1::pTET4_Cre; int18-1:: pMYO2_rtTA-M2-SE-G72P; ade2d::loxP-ADE2-loxP	Expresses Cre under doxycycline inducible promoter (pTET4). YLD133 background	none	wildtype	LD478
YLD138	int18-1:: pTDH3_rtTA-M2-SE-G72P; YLD109 background	Expresses optimized unleaky reverse tetracycline transactivator (rtTA-M2-SE-G72P) under control of yeast TDH3 promoter at integration site 18-1. YLD109 background	none	wildtype	LD479
YLD139	int18-1:: pMYO2_rtTA-M2-SE-G72P; YLD109 background	Expresses optimized unleaky reverse tetracycline transactivator (rtTA-M2-SE-G72P) under control of yeast Myo2 promoter at integration site 18-1. YLD109 background	none	wildtype	LD479
YLD140	int19-1::pTET4_Cre-Cln2; int18-1:: pTDH3_rtTA-M2-SE-G72P; ade2d::loxP-ADE2-loxP	Expresses Cln2-tagged Cre under doxycycline inducible promoter (pTET4). YLD132 background	none	wildtype	LD479
YLD141	int19-1::pTET4_Cre-Cln2; int18-1:: pMYO2_rtTA-M2-SE-G72P; ade2d::loxP-ADE2-loxP	Expresses Cln2-tagged Cre under doxycycline inducible promoter (pTET4). YLD133 background	none	wildtype	LD479
YLD142	int19-1::pTET4_Cre-Cln2, YLD138 background	Expresses Cln2-tagged Cre under doxycycline inducible promoter (pTET4). YLD138 background	none	wildtype	LD479

## Sheet: Plasmids
Plasmid #	Name	Description	Selection marker
pLD024	pRS415-pTDH3-yeGFP-tADH1	yeGFP expressed from a constitutive promoter	Amp,LEU2
pLD141	loxP-pADE2_ADE2_tADE2_loxP	ADE2 expression cassette (from S.boulardii genome, includes endogenous promoter and terminator) inserted between loxP sites on plasmid pLD030	Amp
pLD148	pSynOS_4(alt1)_Cre_tADH1	Cre recombinase under pSynOS4 alt1 promoter. Derived from pLD083	Amp,URA3
pLD201	lox71-pADE2_ADE2_tADE2_lox66	ADE2 expression cassette (from S.boulardii genome, includes endogenous promoter and terminator) inserted between lox71 and lox66 variant sites on plasmid pLD030. Reverse order of pLD193	Amp
pLD205	lox44-pADE2_ADE2_tADE2_lox43	ADE2 expression cassette (from S.boulardii genome, includes endogenous promoter and terminator) inserted between lox44 and lox43 variant sites on plasmid pLD030	Amp
pLD206	lox75-pADE2_ADE2_tADE2_lox76	ADE2 expression cassette (from S.boulardii genome, includes endogenous promoter and terminator) inserted between lox75 and lox76 variant sites on plasmid pLD030	Amp
pLD268	p2B-55_pTDH3_rtTA-M2-SE-G72P(2 micron)	Expresses optimized unleaky reverse tetracycline transactivator (rtTA-M2-SE-G72P) under control of yeast TDH3 promoter. From addgene: https://www.addgene.org/177924/	Amp, URA3
pLD269	p2B-56_pMYO2_rtTA-M2-SE-G72P(2 micron)	Expresses optimized unleaky reverse tetracycline transactivator (rtTA-M2-SE-G72P) under control of yeast MYO2 promoter. From addgene: https://www.addgene.org/177925/	Amp, URA3
pLD270	p2B-58_pTET4_yeGFP(2 micron)	Expresses yeGFP under control of doxycycline-responsive TET4 promoter (contains four rtTA binding sites). From addgene: https://www.addgene.org/177928/	Amp, URA3
pLD271	pTET4_Cre_tADH1	Expresses Cre recombinase under control of doxycycline-responsive TET4 promoter (contains four rtTA binding sites). On pLD148 backbone	Amp, URA3
pLD272	pTET4_Cre-Cln2_tGuo1	Expresses Cln2-tagged Cre recombinase under control of doxycycline-responsive TET4 promoter (contains four rtTA binding sites). On pLD148 backbone	Amp, URA3
